# Supplementary material for: Shaking Alone Induces De Novo Conversion of Recombinant Prion Proteins to β-Sheet Rich Oligomers and Fibrils
Source: PubMed Central journal article supplement (PMC4043794; doi:10.1371/journal.pone.0098753), 2014-06-03

Figure S1. RENAGE of oligomers formed with and without a His6x tag.

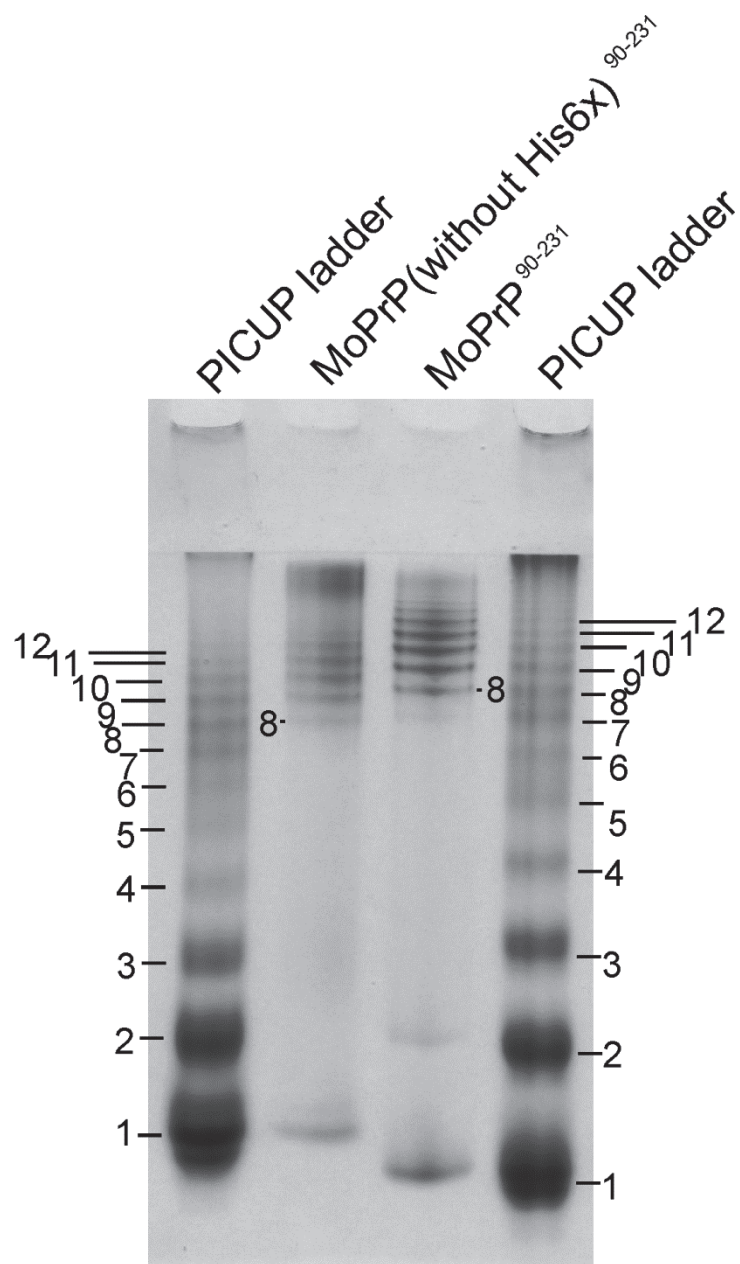

Supplement: pone.0098753.s001.pdf [file pone.0098753.s001.pdf]
