# Supplementary material for: Shaking Alone Induces De Novo Conversion of Recombinant Prion Proteins to β-Sheet Rich Oligomers and Fibrils
Source: PubMed Central journal article supplement (PMC4043794; doi:10.1371/journal.pone.0098753), 2014-06-03

**Figure S2. Fourier transform infrared spectroscopy of shaking-induced fibrils compared to GdnHCl/urea formed fibrils.** A) Fourier transform infrared spectroscopy of shaking-induced prion fibrils (purple line) compared to GdnHCl/urea-formed fibrils (black line). The GdnHCl/urea-formed fibrils were generated with shaking at 350 rpm. B) Spectral deconvolution and component analysis of the fibril spectrum (black line) by fitting Gaussian peaks to a deconvoluted spectrum (purple line).

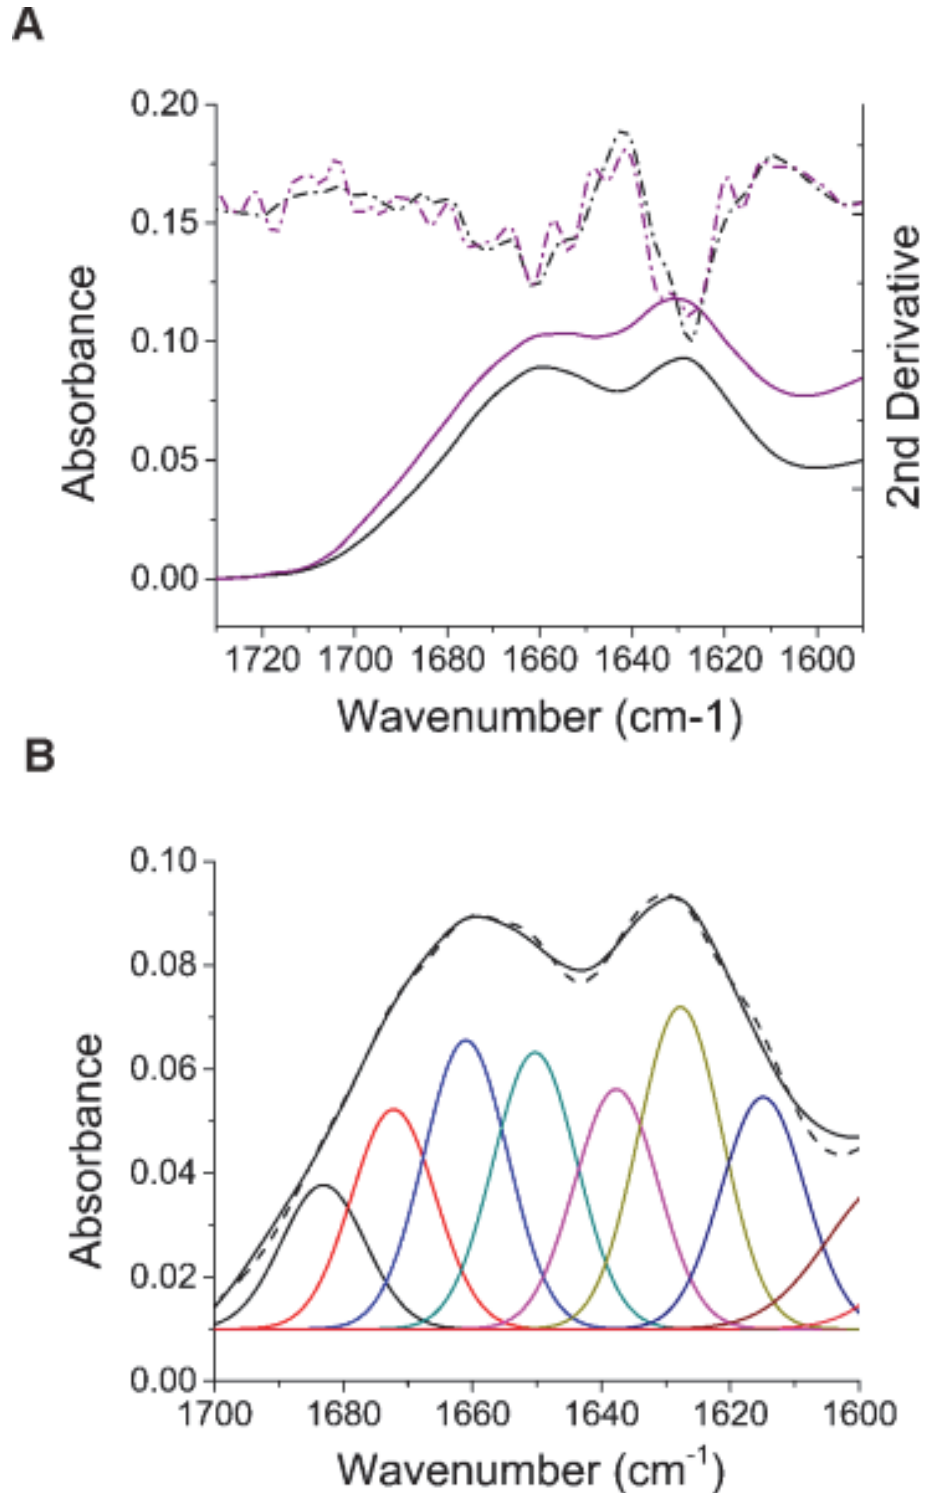

Supplement: pone.0098753.s002.pdf [file pone.0098753.s002.pdf]
