# Supplementary material for: Shaking Alone Induces De Novo Conversion of Recombinant Prion Proteins to β-Sheet Rich Oligomers and Fibrils
Source: PubMed Central journal article supplement (PMC4043794; doi:10.1371/journal.pone.0098753), 2014-06-03
Supplement: pone.0098753.s003.pdf [file pone.0098753.s003.pdf]

Table S1. Secondary structure composition of GdnHCl/urea formed fibrils as determined from deconvolution and curve fitting of the FTIR amide I band.

| <b>Assignment</b>             | <b>Wavenumber (cm<sup>-1</sup>)</b> | <b>Secondary structure (%)</b> |
|-------------------------------|-------------------------------------|--------------------------------|
| Intermolecular $\beta$ -sheet | 1616                                | 16                             |
| Intermolecular $\beta$ -sheet | 1627                                | 22                             |
| $\beta$ -pleated sheets       | 1637                                | 16                             |
| $\alpha$ -helix               | 1650                                | 19                             |
| Turn                          | 1662                                | 19                             |
| Turn/loops                    | 1672                                | 15                             |
| Turn                          | 1683                                | 9.6                            |
